# Supplementary material
Source: Springer Nature journal article supplement (https://www.springermedizin.de/resource/supplementary/11689_2013_49_MOESM4_ESM.pdf/9673118)

# FXS fibroblasts

**MTX** [ $\mu\text{g/ml}$ ]

**C**

**5-Aza**

**0.3**

**0.5**

**1.0**

**1.5**

**2.0**

**2.6**

121

74

48

37

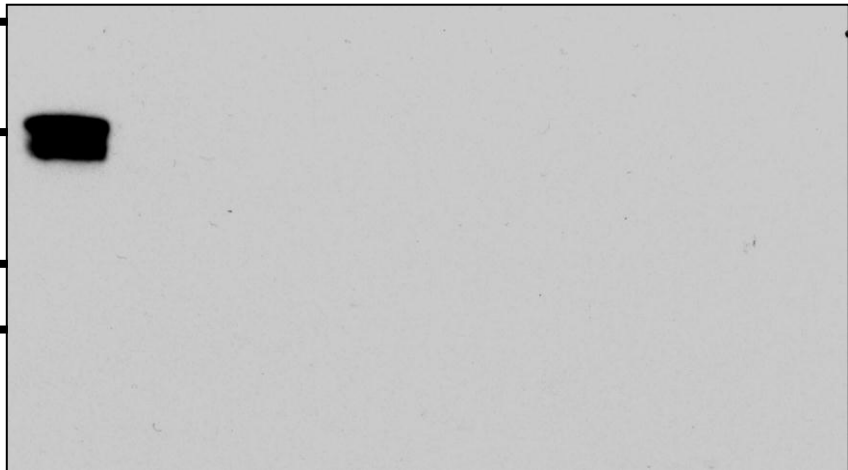

Supplement: MOESM4 [file 9673118]
